# Supplementary material for: Phylogenetic and Developmental Constraints Dictate the Number of Cusps on Molars in Rodents
Source: Sci Rep. 2019 Jul 29;9:10902. doi: 10.1038/s41598-019-47469-x (PMC6662684; doi:10.1038/s41598-019-47469-x)
Supplement: Supplementary file 1 — Dataset 1 [file 41598_2019_47469_MOESM1_ESM.xlsx]

## Sheet: Export Summary
	This document was exported from Numbers. Each table was converted to an Excel worksheet. All other objects on each Numbers sheet were placed on separate worksheets. Please be aware that formula calculations may differ in Excel.
	Numbers Sheet Name	Numbers Table Name	Excel Worksheet Name
	Cusp Counts and Measurements
		Table 1	Cusp Counts and Measurements
	Additional Cusp Counts from Harjunmaa et al. 2014
		Table 1	Additional Cusp Counts from Har

## Sheet: Cusp Counts and Measurements
Table 1
Family	Genus	species	Specimen Number	Mandible Length (straight line)	Cheek-Tooth Row Length (straight line)	CheekToothRow/MandibleLength	p3 length	p4 length	m1 length	m2 length	m3 length	p3 cusp number	p4 cusp number	m1 cusp number	m2 cusp number	m3 cusp number	Total Cusp Number (min)	Extant (0) / Extinct (1)	Notes
Castoridae	Castor	canadensis	FMNH 134455	75.9	27.82	0.367	0	6.38	6.77	6.25	6.49	0	4 or 8	6	6 or 10	7 or 10	23	0	Similar tooth structure and shape to porcupine.
Caviidae	Cavia	porcellus	FMNH 88026	47.9	13.4		0	2.9	3.1	3.2	3.5	0	5	5	5	4	19	0	m
Caviidae	Hydrochoerus	hydrochaeris	FMNH 79933	211	86	0.4076	0	21.87	17.74	19.14	26.08	0	9	11	10	12	42	0	Number of lophs from 16-21 - depending on how you count the lophs.
Sciuridae	Sciurus	niger	FMNH 58968	33	12.14	0.368	0	2.35	2.71	2.56	3	0	4 or 5	5	5 or 6	4	17	0	A loph-like cingulum is present at the anterior ends of m1, m2, and m3.
Sciuridae	Marmota	flaviventris sierare	FMNH 12606	53	18.41	0.347	0	4.6	3.72	3.63	5.13	0	4 or 6	4	4	5 or 6	17	0	cingulum at anterior end of p4 could be made of multiple cusps. Cingulum that wraps around on medial side of m3 - may also have two cusps, clearly has one.
Sciuridae	Tamiasciurus	hudsonicus richardsoni	FMNH 90924	27.9	8.8		0	1.5	1.6	1.9	2.5	0	4 or 5	4	6	6	20	0	F
Sciuridae	Tamiasciurus	richardsoni	FMNH 5571	27.1	9.1		0	2	2	1.7	2.2	0	4	4	6	6	20	0	F
Sciuridae	Petaurista	alboufus candidulus	FMNH 82832	35.9	17.5		0	3	4	3.9	4.7	0	6	9	6	7 or 8	28	0	juvi
Sciuridae	Petaurista	alborufus lena	FMNH 91636	38.2	17.1		0	3.9	3.5	3.6	4.8	0	7	7	7	6	27	0	f
Sciuridae	Iomys	horsfieldi	FMNH 108897	26.5	9		0	1.4	1.6	1.9	2.6	0	5	4	4	4	17	0	f
Sciuridae	Callosciurus	atrodorsalis	FMNH 8301	27.8	9.2		0	1.3	1.8	2.3	2.9	0	4	4	5	5	18	0	m
Sciuridae	Tamiops	swinhoei spencei	FMNH 41000	21.6	6.9		0	2.1	2.2	2.3	2.9	0	4	4	6	5	19	0	m
Erethizontidae	Erethizon	myops	FMNH 20344	79.5	29.22	0.368	0	7.64	5.7	6.03	6.65	0	7	7	5 or 8	5 or 8	21	0
Leporidae	Lepus	californicus	FMNH 15868	63.28	17.5	0.277	4.22	3.08	3.19	3.12	2.48	5 or 6	4	4	4	3 or 4	20	0
Leporidae	Sylvilagus	flordianus	FMNH 16055	50.05	13.78	0.275	3.41	2.63	2.08	2.15	1.8	5	4	4	4	4	21	0
Muridae	Aethomys	hindei	FMNH 153217	20	6.2		na	na	2.4	1.3	0.7	na	na	9	6	4	19	1	Male
Muridae	Apodemus	agarius	FMNH 32782	12.5	3.8		NA	na	0.8	0.5	0.6	na	na	7	5	4	18	1	Male
Muridae	Avricanthus	niloticus	FMNH 98812	22	7		na	na	2.6	1.9	1.8	na	na	8	5	4	17	1	Male
Muridae	Bandicota	indica	FMNH 83048	31.1	9.5		NA	na	3	1.3	1.7	na	NA	7	7	5	19	1	Male
Muridae	Berylmys	bowersi	FMNH 76474	27	8.7		na	na	3.1	2	1.8	na	na	8	6	4	18	1	Male
Muridae	Chiropodomys	gliroides	FMNH 65889	12.1	4		na	na	1.3	0.9	0.7	na	na	9	6	4	19	1	Male
Muridae	Crateromys	schadenbergi	FMNH 62295	41.1	16.3		na	na	6.3	4.5	4.6	na	na	7	5	3	15	1	Male
Muridae	Dasmys	incomtus	FMNH 28634	21.8	6.7		na	na	2.2	1	1.1	na	na	6	5	4	15	1	Male
Muridae	Dephomys	defua	FMNH 54670	17	5.5		na	na	1.7	1.1	0.9	na	na	7	5	3	15	1	Male
Muridae	Grammomys	dolichurus	FMNH 86252	15.1	4.4		na	na	1.5	1.1	1.1	na	na	9	7	4	20	1	Male
Muridae	Hybomys	univittatus	FMNH 189161	16.9	5.7		na	na	2.4	1.4	1	na	na	8	6	3	17	1	Male
Muridae	Hylomyscus	stella	FMNH 165221	13	3.6		na	na	1.7	1	0.6	na	na	8	8	6	22	1	Male
Muridae	Lemniscomys	striatus	FMNH 231770	14.5	4.8		na	na	1.8	1.3	1	na	na	9	7	4	20	1	Male
Muridae	Leopoldamys	sabanus	FMNH 168675	30	9.2		na	na	3.7	2	2.5	na	na	7	5	4	16	1	Male
Muridae	Malacomys	longipes	FMNH 207809	21.2	5.5		na	na	2.4	1.3	0.9	na	na	7	5	4	16	1	Male
Muridae	Mastomys	natalensis	FMNH 165636	15.7	4.7		na	na	1.8	1.2	1.1	na	na	7	6	4	17	1	Male
Muridae	Mus	musculus	FMNH 15366	11.6	3		na	na	1.3	0.6	0.2	na	na	6	5	3	13	1	Male
Muridae	Nesokia	indica	FMNH 103780	22.5	7.6		na	na	2.4	1.5	0.9	na	na	6	4	4	14	1	Male
Muridae	Notomys	mitchelli	FMNH 202351	16.1	4.6		na	na	2.1	1.1	0.5	na	na	7	6	4	17	1	Male
Muridae	Oenomys	hypoxanthus	FMNH 81918	17.8	6.5		na	na	2.7	1.8	1.8	na	na	9	7	4	20	1	Male
Muridae	Pelomys	campanae	FMNH 81889	18.6	5.3		na	na	2.1	1.2	1.5	na	na	6	4	3	13	1	Male
Muridae	Hydromys	chyrsogaster	FMNH 60692	29.4	8.8		NA	NA	4.6	3.5	na	na	na	6	9	0	15	1	Unknown
Hystricognath	Protophiomys	tunisiensis	NA		6.36	NA	0	1.29	1.63	1.72	1.72	0	5	6	6	6	23	1	L. Marivaux, E. M. Essid, W. Marzougui, H.K. Ammar, S. Adnet, B. Marandat, G. Merzeraud, R. Tabuce, and M. Vianey-Liaud. 2014. A new and primitive species of Protophiomys (Rodentia, Hystricognathi) from the late middle Eocene of Djebel el Kébar, Central Tunisia. Palaeovertebrata 38(1):1-17 [P. Coster/P. Coster/P. Mannion] more details
Lagomorpha	Gomphos	sp.	IVPP (Assorted)	NA	NA	NA	NA	NA	NA	NA	NA	4	2	4	6	3	19	1	R. J. Asher, J. Meng, J. R. Wible, M. C. McKenna, G. W. Rougier, D. Dashzeveg, and M. J. Novacek. 2005. Stem lagomorpha and the antiquity of Glires. Science 307:1091-1094
Lagomorpha	Mimolagus	aurorae	IVPP (Assorted)	NA	NA	NA	NA	NA	NA	NA	NA	5	NA	NA	5 or 6	7	23	1	Łucja Fostowicz-Frelik1*, Chuankui Li1, Fangyuan Mao1, Jin Meng2 & Yuanqing Wang1 2015.
Notes:	m = male	f = female	when cusp count was estimated (4 or 5) the lower number was used to estimate cusp number	NA = Not available	Strikethrough = Animals represented by fossils presumed to be extinct species	Citations are provided for fossil specimens
	=ttest(E3:E39;F3:F39; 2 arms equally; t-test)			0.9904	0.173515									6.21205e-06			0.00963752

## Sheet: Additional Cusp Counts from Har
Specimen/Species	Cusp Count
Eda null (0 ng/ml EDA)	2.54
Eda null (2.5 ng/ml EDA)	3
Eda null (10 ng/ml EDA)	4
Eda null (25 ng/ml EDA)	4
Eda null (50 ng/ml EDA)	4.92
Eda null (100 ng/ml EDA)	5.29
Eda null (500 ng/ml EDA)	5.4
Eda null (1000 ng/ml EDA)	5.76
Wild type (0 ng/ml EDA)	5.7
Tribosphenomys minutus	5
Anisomys imitator	7
Bunomys coelestis	7
Hydromys chrysogaster	6
Hyomys goliath	9
Leptomys elegans	7
Mallomys rothschildi	7
Niviventer rapit	7
Notes: Strike through = extinct species; No specimen numbers were provided; EDA specimens belong to Mus musculus
